# Supplementary material for: Single nucleotide polymorphisms in the MYLKP1 pseudogene are associated with increased colon cancer risk in African Americans
Source: PubMed Central journal article supplement (PMC6116948; doi:10.1371/journal.pone.0200916), 2018-08-30

**Supplementary Table A:** Haplotypes for rs12490683 and rs12497343 combined and by disease status and ethnicity

| rs12490683 | rs12497343 | Combined Frequency | AA Control | AA Case | EA Control | EA Case | Chi Squared (All groups) | P value |
|------------|------------|--------------------|------------|---------|------------|---------|--------------------------|---------|
| [G]        | [C]        | 0.68045            | 0.76151    | 0.73632 | 0.61675    | 0.60635 | 0.0283                   | 0.9987  |
| [G]        | [G]        | 0.03080            | 0.05099    | 0.04602 | 0.01523    | 0.01086 | 0.0416                   | 0.9978  |
| [A]        | [C]        | 0.00339            | 0          | 0       | 0          | 0.00978 | 0.0293                   | 0.9987  |
| [A]        | [G]        | 0.28535            | 0.18750    | 0.21766 | 0.36802    | 0.37301 | 0.1000                   | 0.9918  |

**Supplementary Figure A: Histogram of ratio of West African Ancestry in African American controls and African American Colorectal Cancer Patients**

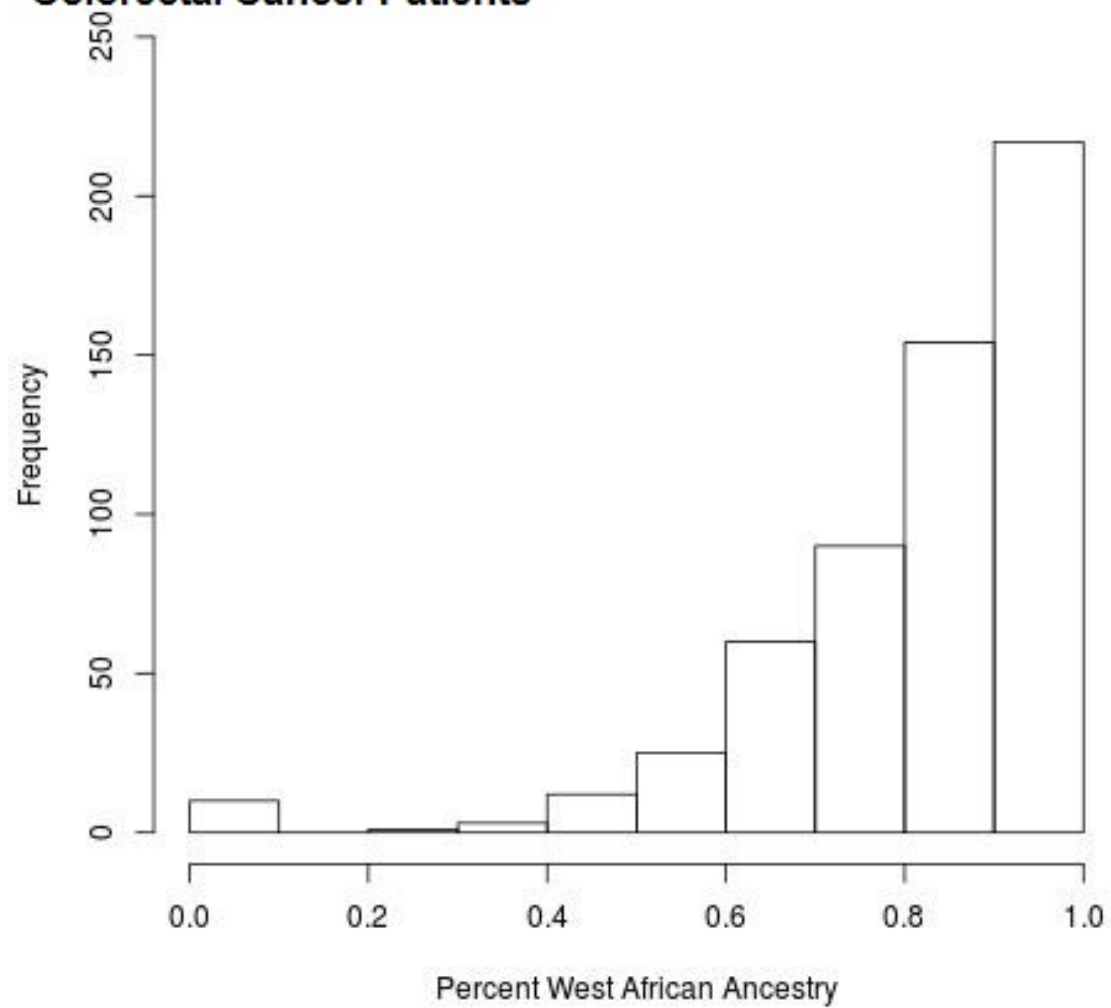

Supplement: pone.0200916.s001.pdf [file pone.0200916.s001.pdf]
